1

2

3

Concurrent Guidance of Attention by Multiple Working Memory Items:

4

Behavioral and Computational Evidence

5

6

Cherie Zhou, Monique M. Lorist, Sebastiaan Mathôt

7

University of Groningen

8

9

10

11

12

Author Note

13

Cherie Zhou<sup>1</sup>, Monique M. Lorist<sup>1,2</sup>, Sebastiaan Mathôt<sup>1</sup>,

14

<sup>1</sup>Department of Experimental Psychology, University of Groningen,

15

<sup>2</sup>Faculty of Medical Sciences, Biomedical Sciences of Cells & Systems, Neurosciences,

16

Neuroimaging Center, University of Groningen, The Netherlands

17

This research was supported by the Chinese Scholarship Council to Cherie Zhou and a

18

Innovational Research Incentives Scheme VENI (Grant 016.Veni.175.078) by the Netherlands

19

Organisation for Scientific Research (NWO) to Sebastiaan Mathôt.

20

Correspondence concerning this article should be addressed to Cherie Zhou,

21

Department of Experimental Psychology, University of Groningen, Grote Kruisstraat 2/1, 9712

22

TS, Groningen. E-mail: xiaoyi.zhou@rug.nl

23 Abstract

24 During visual search, task-relevant representations in visual working memory (VWM), known  
25 as attentional templates, are assumed to guide attention. A current debate concerns whether  
26 only one (Single-Item-Template hypothesis, or SIT) or multiple (Multiple-Item-Template  
27 hypothesis, or MIT) items can serve as attentional templates simultaneously. The current study  
28 was designed to test these two hypotheses. Participants memorized two colors, prior to a visual-  
29 search task in which the target and the distractor could match or not match the colors held in  
30 VWM. Robust attentional guidance was observed when one of the memory colors was  
31 presented as the target (reduced response times [RTs] on target-match trials) or the distractor  
32 (increased RTs on distractor-match trials). We constructed two drift-diffusion models that  
33 implemented the MIT and SIT hypotheses, which are similar in their predictions about overall  
34 RTs, but differ in their predictions about RTs on individual trials. Critically, simulated RT  
35 distributions and error rates revealed a better match of the MIT hypothesis to the observed data  
36 than the SIT hypothesis. Taken together, our findings provide behavioral and computational  
37 evidence for the concurrent guidance of attention by multiple items in VWM.

38

39 *Keywords:* visual working memory, visual search, attentional guidance, attentional  
40 capture, drift diffusion

41 Significance statement

42 Theories differ in how many items within visual working memory can guide attention at the  
43 same time. This question is difficult to address, because multiple- and single-item-template  
44 theories make very similar predictions about average response times. Here we use drift-  
45 diffusion modeling in addition to behavioral data, to model response times at an individual  
46 level. Crucially, we find that our model of the multiple-item-template theory predicts human  
47 behavior much better than our model of the single-item-template theory; that is, modeling  
48 of behavioral data provides compelling evidence for multiple attentional templates that are  
49 simultaneously active.

50 Simultaneous Guidance by Multiple Attentional Template

51 Internal representations of task-relevant information, or *attentional templates*, stored in  
52 visual working memory (VWM), guide attention in visual search (Bundesen, 1990; Bundesen  
53 et al., 2005). For example, when you are looking for a chocolate cake, all dark items in a bakery  
54 will be more likely to draw your attention. The biased-competition framework (Desimone,  
55 1998) states that VWM leads to pre-activation of memorized features in visual cortex. In this  
56 example, when you keep the color of a chocolate cake in VWM, neurons in color-selective  
57 areas that represent this color become pre-activated. And later, when the color is actually  
58 perceived, this pre-activation leads to an enhanced neural response, which at the behavioral  
59 level results in attention being drawn towards chocolate-cake-like objects. In other words,  
60 VWM contents guide attention towards memory-matching items in a top-down manner to  
61 optimize visual search (Chelazzi, Miller, Duncan, & Desimone, 1993; Chelazzi, Duncan,  
62 Miller, & Desimone, 1998).

63 Although multiple representations can be maintained in VWM simultaneously, there is  
64 ongoing debate about the number of VWM items that can simultaneously serve as attentional  
65 templates. The Single-Item-Template hypothesis (SIT; Houtkamp & Roelfsema, 2006; Olivers,  
66 Peters, Houtkamp, & Roelfsema, 2011) proposes a functional division within VWM: While  
67 one item actively interacts with visual processing to guide attentional selection towards  
68 matching items, other items are shielded from visual sensory input, and thus cannot guide  
69 attention.

70 Studies demonstrating a switch cost between templates are often interpreted as evidence  
71 for the SIT model. In a study by Dombrowe, Donk, and Olivers (2011), participants made a  
72 sequence of two eye movements towards two spatially separated target items which were  
73 indicated by arrows. In the switch condition, the two targets had different colors, and thus

74 required a switch between two templates; in the no-switch condition, both targets had the same  
75 color, and thus required only one attentional template. Crucially, eye movements that were  
76 correctly aimed at the second target were delayed by about 250ms – 300ms in the switch  
77 condition, compared to the no-switch condition. This cost associated with switching between  
78 templates is in line with the SIT hypothesis, suggesting that only one template can be active at  
79 one time.

80 In contrast to the SIT hypothesis, the Multiple-Item-Template (MIT) hypothesis  
81 suggests that multiple VWM items can guide attention simultaneously (Beck et al., 2012),  
82 although holding multiple items in VWM would reduce the memory quality of each item, thus  
83 reducing memory-driven guidance (Bays & Husain, 2008; Kristjánsson & Kristjánsson, 2018).  
84 As Kristjánsson et al. (2018) point out, even if multiple VWM items *can* guide attention  
85 simultaneously, this does not mean that they always do; specifically, they propose that multiple  
86 VWM items guide attention at the same time only when this is needed for the task. The MIT  
87 hypothesis builds on research suggesting that there is no unitary spotlight of attention, but  
88 rather that attention can be divided (Eimer & Grubert, 2014), in this case, across multiple  
89 memory-matching items.

90 Recent work by (Beck & Hollingworth, 2017) supported the MIT hypothesis. In their  
91 experiment (a saccadic sequential search task), participants first saw a cue that consisted of two  
92 colors (e.g., red and blue), followed by two pairs of colored objects, presented one pair at a  
93 time. The first pair always contained one non-matching distractor (e.g., yellow) and one object  
94 that matched one of the cued colors (e.g., red); participants fixated this cue-matching object. In  
95 the second pair, the cue-matching object from the first pair was presented either with a new  
96 non-matching distractor (e.g., green), or with an object that matched the remaining cued color  
97 (blue). In the latter case, participants were free to select either object. Critically, when

98 participants were free to select either the first- or the second-cued color in the second pair, the  
99 selection probability of the first cued color was substantially reduced: They were about as likely  
100 to first select red and then blue, as they were to select red twice. In other words, even though  
101 participants presumably had an active search template for the first-cued color, the second-cued  
102 color was able to compete with it. This competition between the two cue-matching objects  
103 suggests that both templates were maintained in an active state in VWM.

104         However, when looking at behavioral evidence comparing the SIT and MIT hypothesis  
105 (e.g., (Hollingworth & Beck, 2016; van Moorselaar et al., 2014), it is difficult to distinguish  
106 between the two hypotheses by only observing average RTs across trials. A more powerful  
107 way to distinguish the underlying cognitive processes is by analyzing RT distributions, an  
108 approach that has been used successfully in previous studies. For example, (Chetverikov A et  
109 al., 2017; Chetverikov et al., 2016) looked at RT distributions to test how different properties  
110 of previously observed distractor distributions (e.g., shape) influence search times. And (Sung,  
111 2008) analyzed RT distributions for displays of different set sizes to distinguish parallel from  
112 serial mechanisms in visual selection. Following this approach, in the current study, we  
113 compared not only the average RTs, but also the RT distributions of trials in different  
114 conditions under the SIT and the MIT hypothesis. Critically, we simulated individual trials  
115 based on the predictions of two hypotheses by means of a drift-diffusion model (Ratcliff &  
116 McKoon, 2008) and compare the simulated data to the obtained data. We implemented a visual-  
117 search task based on the additional-singleton paradigm (Theeuwes, 1992). Participants first  
118 kept two colors in working memory, after which they searched for a colored target shape among  
119 a colored distractor shape and, in one experiment (Experiment 1), a grey distractor shape. The  
120 color of the target and the (colored) distractor was manipulated to match or not match the  
121 memorized colors.

122 Overall, both the SIT and MIT hypotheses predict faster reaction times (RTs) on target-  
123 match trials (i.e., only the target color matches one of the memory colors), and slower RTs on  
124 distractor-match trials (i.e., only the distractor color matches one of the memory colors).  
125 However, the SIT and MIT hypotheses make different predictions about what happens on  
126 individual trials. Specifically, when the target matches a VWM color, then the MIT hypothesis  
127 predicts that attention is always guided toward the target; in contrast, the SIT hypothesis  
128 predicts that attention is only guided toward the target on 50% of trials, because there is only a  
129 50% chance that the target color serves as an attentional template.

130 Furthermore, we also manipulated the congruency between the target and the distractor  
131 to investigate whether both memory colors guide attention. Inside the target, the orientation of  
132 a line-segment was either congruent, or incongruent, with a line-segment inside the (colored)  
133 distractor. The MIT hypothesis predicts the strongest congruency effect on both-match trials  
134 (i.e., both the target and the distractor match the memory colors), because attention is  
135 simultaneously guided towards both the target and the distractor. Therefore, when the line-  
136 segment orientations of target and distractor are congruent, it is easier to report the orientation  
137 even though attention is partly drawn to the distractor, resulting in reduced RTs and error rates.  
138 In contrast, in the incongruent condition, there is more cognitive conflict caused by the different  
139 orientation of the matching distractor, resulting in increased RTs and error rates. The SIT  
140 hypothesis does not predict that attention is guided simultaneously towards the target and the  
141 distractor and therefore does not predict an especially strong congruency effect on both-match  
142 trials.

143 When it comes to the RT distribution of individual trials, the MIT hypothesis predicts  
144 that the distribution for both-match and non-match (i.e., neither the target nor the distractor  
145 match the memory colors) trials are the same, or at least very similar: On both-match trials,

146 attention is guided toward both the target and the distractor, and the resulting facilitation and  
147 interference should approximately cancel each other out, resulting in an RT distribution that is  
148 similar to the condition where no color matches the VWM items. In contrast, under the SIT  
149 hypothesis, on both-match trials, attention is guided either toward the target, resulting in fast  
150 RTs, or toward the distractor, resulting in slow RTs, but never to both at the same time. Thus,  
151 the distribution for both-match trials is expected to be wider than that for non-match trials.<sup>1</sup> We  
152 built drift-diffusion models of individual trials to simulate the two hypotheses' predictions  
153 about RT distributions, and compared these with the collected data.

154 To foresee the results: The data by-and-large favor the predictions of the MIT  
155 hypothesis over the SIT hypothesis.

## 156 **Experiment 1**

### 157 **Preregistration**

158 Before conducting the experiment, we pre-registered the experimental designs on the  
159 Open Science Framework (OSF). A detailed pre-registration of the experiment is available at  
160 <https://osf.io/sy7n8/>. All deviations from the preregistration will be mentioned below.

---

<sup>1</sup> One can also imagine a version of the MIT hypothesis in which guidance of attention is parallel (such that multiple items can draw attention), but that due to a winner-takes-all process, attention is only deployed to a single item at a time (i.e. deployment of attention is serial). This model, which we will not consider further, makes predictions that are very similar to the SIT model, and for the present discussion can be considered analogous to the SIT hypothesis.



161 **Method**

162 **Participants**

163 We conducted a power analysis based on the results of a replication of Hollingworth  
164 and Beck (2016) as performed by Frătescu et al. (2019). Here the authors found that the effect  
165 size of the Distractor condition was  $f = 0.65$ . A power analysis conducted with G\*Power (Faul  
166 et al., 2007) revealed that in order for this effect to be detected with a power of 95% and an  
167 alpha of .05, a sample of only seven participants would be required. Although this study is not  
168 identical to ours, this power analysis shows that memory-driven capture effects are strong and  
169 can be detected with few participants. However, our aim was to collect highly precise  
170 measurements that we could use also for computational modeling. In addition, we were  
171 interested in a modulation of the memory-driven capture effect by orientation congruency, and  
172 we had no a prior prediction about the strength of this modulatory effect. Therefore, we decided  
173 to collect at least 30 participants per experiment, which we felt confident would provide  
174 sufficient statistical power.

175 Thirty-five first-year psychology students (aged from 18 to 23 years old; 18 female, 17  
176 male) from the University of Groningen participated in exchange for course credits. All  
177 participants had normal or corrected-to-normal acuity and color vision. The study was  
178 approved by the local ethics review board of the University of Groningen (18123-S).  
179 Participants provided written informed consent before the start of the experiment.

180 **Stimuli, design and procedure**

181 Participants were seated in a dimly lit, sound-attenuated testing booth, behind a  
182 computer screen on which the stimuli appeared at a viewing distance of approximately 62 cm.  
183 Stimuli were presented on a 27" flat-screen monitor at a refresh rate of 60 Hz running

184 OpenSesame (version 3.2; Mathôt et al., 2012). Each trial started with a 500ms fixation display,  
185 followed by a 1,000ms memory display, consisting of two color disks ( $2.7^\circ$  visual angle) placed  
186 in the middle of the screen to the left and the right of the fixation dot, with an eccentricity of  
187  $5.4^\circ$  visual angle (*Figure 1*). The memory colors were randomly drawn from a HSV (hue-  
188 saturation-value) color circle with full value (i.e., brightness) and saturation for each hue  
189 (luminance ranged between  $49 \text{ cd/m}^2$  and  $90 \text{ cd/m}^2$ ), with the restriction that colors were at  
190 least  $30^\circ$  away from each other on the color circle. Participants were instructed to remember  
191 the exact colors of the items, and not the color category, to discourage verbalization.

192         Following a 200ms fixation display, the search display was presented and remained  
193 visible until a response was given. The search display consisted of three shapes ( $1.3^\circ$  visual  
194 angle): one diamond-shaped, colored target; one square-shaped, colored distractor and another  
195 square-shaped, gray distractor, all placed around the fixation dot, with an eccentricity of  $5.4^\circ$   
196 visual angle). The colors of the target (diamond) and the colored distractor (square) either  
197 matched or did not match the remembered color depending on the *Target-Color-Match* (Match,  
198 Non-Match) and *Distractor-Color-Match* condition (Match, Non-Match), resulting in four  
199 types of trials: Non-Color-Match (i.e. target-color-non-match, distractor-color-non-match),  
200 Target-Color-Match (i.e., target-color-match, distractor-color-non-match), Distractor-Color-  
201 Match (i.e., target-color-non-match, distractor-color-match), and Both-Color-Match (i.e.  
202 target-color-match, distractor-color-match). All shapes in the search display contained a line  
203 segment ( $1.1^\circ$  visual angle) that was tilted  $22.5^\circ$  clockwise or counterclockwise from a vertical  
204 orientation. The line segments in the target and the colored distractor were tilted in the same  
205 (Congruent) or a different (Incongruent) direction depending on the *Orientation-Congruency*  
206 condition. The line segment inside the grey distractor was chosen randomly, and will not be  
207 analyzed.

208           In our experiment, a color match was always exact; that is, when participants  
209 memorized a shade of green, then, on a Target-Color-Match trial, the visual-search target was  
210 always the exact same shade of green. However, this is not necessary for memory-driven  
211 capture to occur: both exact and inexact color matches lead to memory-driven capture (e.g.,  
212 (Hollingworth & Beck, 2016); see also our own supplementary analysis on the OSF).

213           Participants indicated the orientation of the line segment within the diamond by clicking  
214 either the left or right mouse button as quickly and accurately as possible. Feedback was given  
215 for 500ms immediately following the response: a green dot for a correct response, or a red dot  
216 for an incorrect response. Each trial ended with a memory test, in which participants selected  
217 the exact color they memorized in the color circle. They did this twice, once for each  
218 memorized color. Visual feedback followed, comparing the colors they selected with those that  
219 they actually saw. The accuracy of each memory test was recorded as *memory precision*.

220           The three factors (*Target-Color-Match*, *Distractor-Color-Match*, *Orientation-*  
221 *Congruency*) were mixed randomly within blocks. Participants completed eight blocks of 32  
222 trials each (256 trials in total), preceded by one practice block of 32 trials which was excluded  
223 from analysis.

MULTIPLE ATTENTIONAL TEMPLATES GUIDE ATTENTION

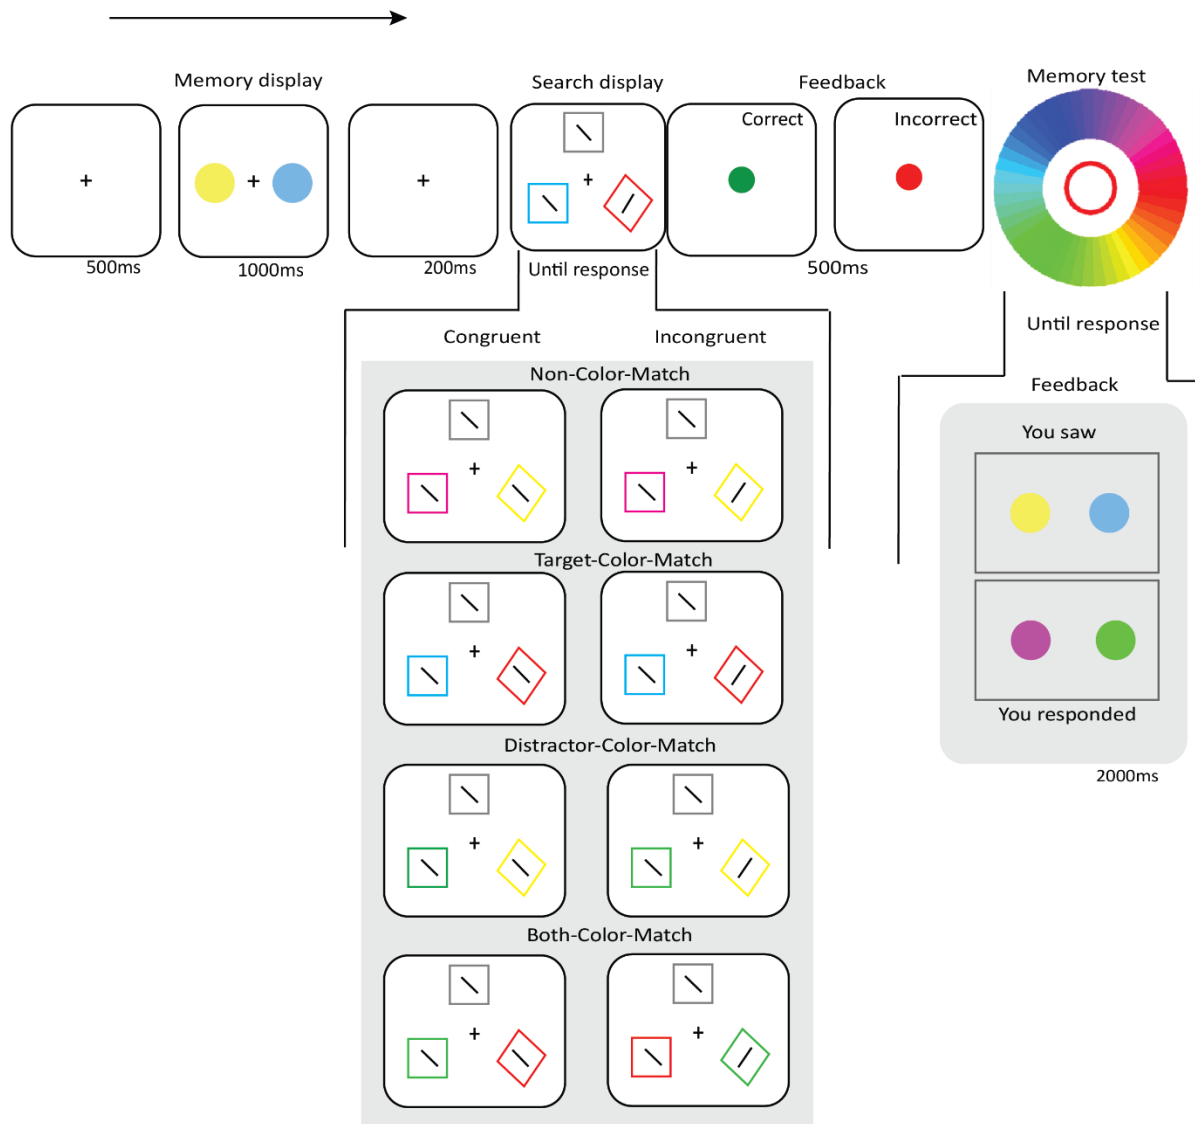

224

225 *Figure 1.* Sequence of events in a trial of *Experiment 1*. All Target-Color-Match and Distractor-  
226 Color-Match conditions in the search display for both Congruent and Incongruent trials are  
227 illustrated.

228 **Data processing**

229 Trials with RTs shorter than 200ms and longer than 2,000ms were excluded. Next,  
230 participants were excluded from analyses if their accuracy on the search task was less than .7.  
231 (These criteria were not preregistered. We added them because our preregistered criteria failed  
232 to exclude some data points that were clearly unsatisfactory, such as participants who scored  
233 at chance level on the search task.) No participants were excluded based on our preregistered

234 criterion of having a mean RT that deviated from more than 2.5 SD from the grand mean. Only  
235 RT data of correct trials were analyzed. Thirty participants and 7478 trials (of 8960) remained  
236 for further analysis.

### 237 **Data analysis**

238         The data were analyzed using the JASP software package (version 0.9; JASP Team,  
239 2018) with the default settings, with *Target-Color-Match* (Match, Non-Match), *Distractor-*  
240 *Color-Match* (Match, Non-Match), and *Orientation-Congruency* (Congruent, Incongruent) as  
241 factors. (This deviates slightly from the preregistration, in which we treated Color-Match as a  
242 single factor with four levels.) We used inclusion Bayes Factor based on matched models  
243 (Rouder et al., 2009) to quantify evidence for effects.

244         Following (Lee & Wagenmakers, 2013), we considered Bayes factors (*BFs*) between 1  
245 and 3 or between .3 and 1 as indicators of “anecdotal” evidence in favor of the alternative ( $H_1$ )  
246 or the null hypothesis ( $H_0$ ), respectively; *BFs* between 3 and 10 or between .1 and .33 are  
247 indicators of “moderate” evidence; *BFs* between 10 and 30 or between .03 and .1 are indicators  
248 of “strong” evidence; and *BFs* between 30 and 100 or between .01 and .03 are indicators of  
249 “very strong” evidence of  $H_1$  or  $H_0$ .

250 **Results and Discussion**

251 **Search RTs**

252 Analyses revealed very strong evidence for the effect of Target-Color-Match ( $BF_{10} =$   
253  $3.30 \times 10^{24}$ ) and Distractor-Color-Match ( $BF_{10} = 4.07 \times 10^{15}$ ), such that RTs were faster when  
254 the target matched the memory color, and slower when the distractor matched the memory  
255 color (*Figure 2*). Moreover, we found moderate evidence for the effect of Orientation-  
256 Congruency ( $BF_{10} = 7.19$ ), suggesting that RTs were faster on congruent trials than incongruent  
257 trials. No interaction effect between the factors was found (all  $BF_{10} < .06$ ). (We also performed  
258 a supplementary analysis that included Memory Precision, based on a median split, as an  
259 additional factor. This revealed that memory precision of the VWM contents did not affect RTs  
260 or interact with any of the other factors. For more information, see the OSF project.)

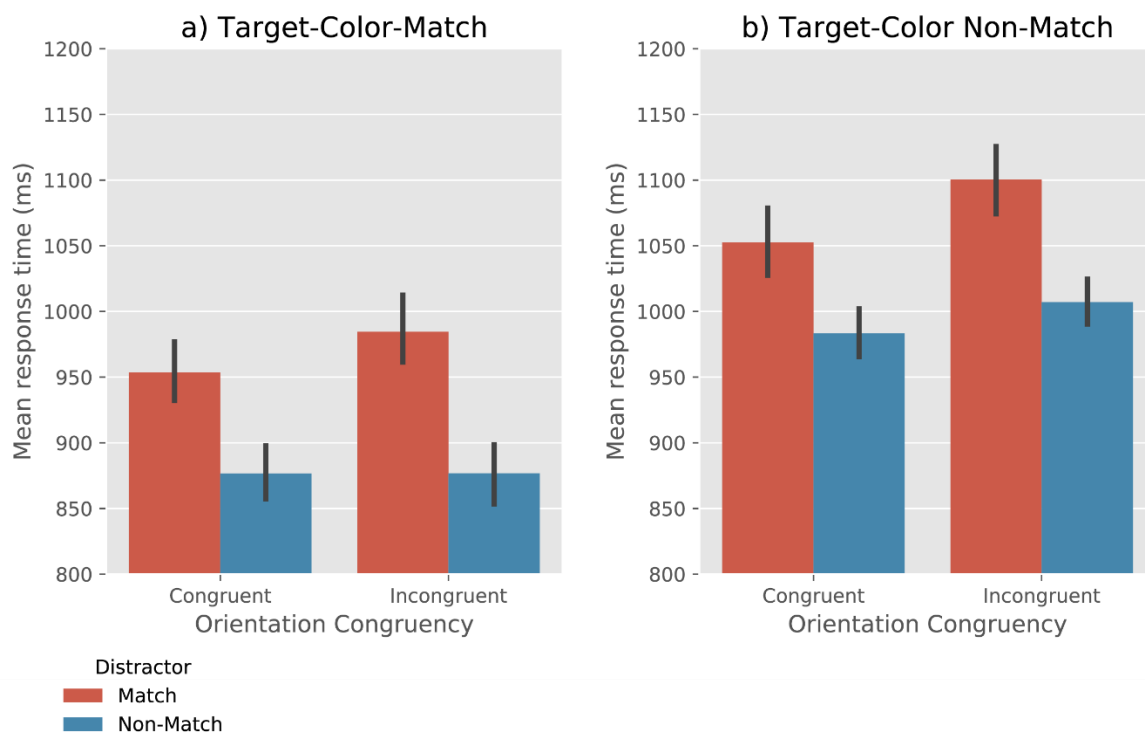

261

262 *Figure 2.* Mean response time as a function of Target-Color-Match, Distractor-Color-Match,  
263 and Orientation-Congruency. Error bars reflect condition-specific, within-subject 95%  
264 confidence intervals (Morey, 2008).

### 265 **RT distributions**

266 To test whether only one (i.e. SIT) or both (i.e. MIT) of the color items maintained in  
267 working memory served as attentional template, we analyzed the RT distributions for the Both-  
268 Color-Match and Non-Color-Match trials. According to the SIT hypothesis, on Both-Color-  
269 Match trials, attention is guided by the target on some trials, which leads to faster RTs, while  
270 on other trials attention is guided by the distractor, which leads to slower RTs. Therefore, the  
271 Both-Color-Match trials should result in a bimodal distribution (i.e. wider than that of the Non-  
272 Color-Match trials) according to the SIT hypothesis. In contrast, the MIT hypothesis predicts  
273 that on Both-Color-Match trials, both the target and the distractor guide attention, thus resulting  
274 in a unimodal distribution (i.e. resembling that of the Non-Color-Match trials).

275 To test this, an Inverse Gaussian distribution was fit to the RTs per condition for each  
276 participant. The scale parameter, which reflects the width of the distributions was analyzed  
277 using a evidenc T-test. We found moderate evidence that the RT distributions for the Both-  
278 Color-Match and the Non-Color-Match trials were equally wide ( $BF_{01} = 4.05$ , error % = .002),  
279 as predicted by the MIT hypothesis.

### 280 **Accuracy**

281 Analyses revealed moderate evidence for the effect of Target-Color-Match ( $BF_{10} =$   
282 3.02) and Distractor-Color-Match ( $BF_{10} = 6.58$ ), such that the overall search accuracy was  
283 higher when the target matches the memory color, and lower when the distractor matches the  
284 memory color (*Figure 3*). Furthermore, we found very strong evidence for the effect of

285 Orientation-Congruency on accuracy ( $BF_{10} = 4.50 \times 10^{13}$ ), showing that search performance was  
286 more accurate when the orientation of the line-segment in a target was congruent with that in  
287 a distractor than when they were incongruent. No evidence for any interaction effect between  
288 the factors was found (all  $BF_{10} < 2.0$ ). (A supplementary analysis that included Memory  
289 Precision as an additional factor revealed that memory precision did not affect accuracy or  
290 interact with any of the other factors. For more information, see the OSF project.)

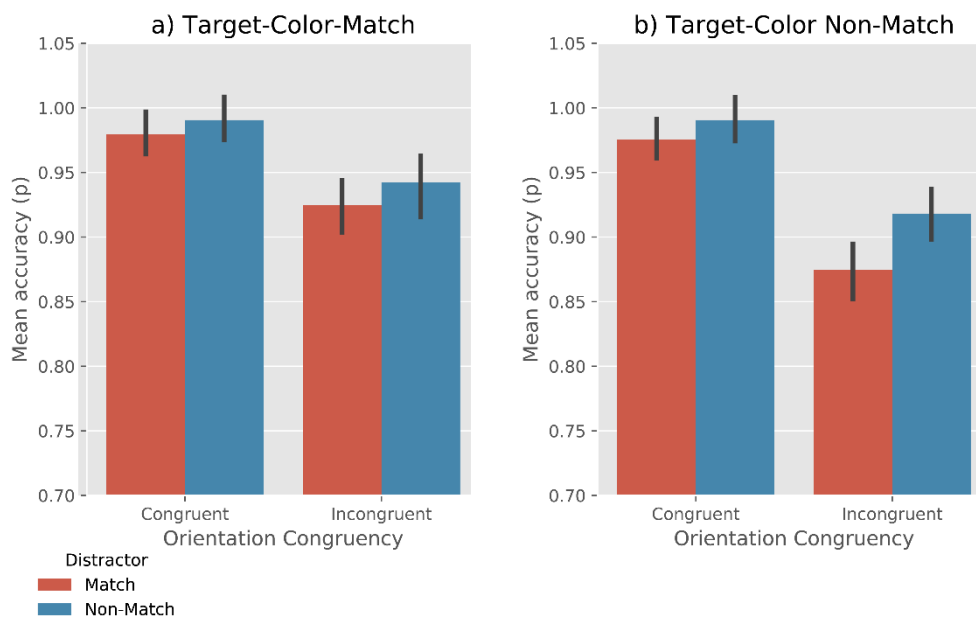

291

292 *Figure 3.* Mean accuracy rate as a function of Target-Color-Match, Distractor-Color-Match,  
293 and Orientation-Congruency. Error bars reflect condition-specific, within-subject 95%  
294 confidence intervals (Morey, 2008).

295 In summary, search performance increased (i.e. became faster and more accurate) when  
296 the target matched one of the colors held in VWM, but decreased when the distractor matched  
297 the VWM item. Moreover, the RT distribution for both-match trials and no-match trials are  
298 similar, which suggests that both color items that were maintained in the VWM draw attention.  
299 These results are consistent with the assumptions of the MIT hypothesis, as we will discuss in  
300 the General Discussion.



301 Unlike we predicted, however, we did not find that the effect of Orientation-  
302 Congruency was especially strong when both the target and the distractor matched, compared  
303 to other conditions. We suspected that the presence of the grey (unrelated) color might have  
304 affected the processing of the target and the distractor in visual search. Therefore, in the follow-  
305 up experiment, we removed the grey color in the search display.

## 306 **Experiment 2**

307 In Experiment 2, we removed the grey color item (the unrelated item) from the search  
308 display. We reasoned that this would increase the strength of the Orientation-Congruency  
309 effect, because there were now only two line segments in the display, thus providing a stronger  
310 test of our prediction that the effect of Orientation-Congruency should be strongest when both  
311 the distractor and the target matched the VWM colors. Furthermore, we wanted to replicate the  
312 main results of Experiment 1.

## 313 **Preregistration**

314 The preregistration was the same as in Experiment 1 expect for the data exclusion  
315 criteria, which now stated that the data would be trimmed based on a 70% accuracy rate. A  
316 detailed pre-registration of the experiment is available at <https://osf.io/xpzhy/>.

## 317 **Method**

### 318 **Participants**

319 Thirty-six first-year psychology students (aged from 18 to 25 years old; 20 female, 16  
320 male) from the University of Groningen participated in exchange for course credits. All  
321 participants had normal or corrected-to-normal acuity and color vision.

322 **Stimuli, design and procedure**

323 The method was the same as in Experiment 1 except for the following. The search  
324 display consists of one diamond-shaped, colored target, and one square-shaped, colored  
325 distractor, placed on an imaginary circle around the fixation with equal space between them  
326 (see *Figure 4*).

327 **Data processing**

328 The same trimming criteria and analyses were used as in Experiment 1. Thirty  
329 participants and 7548 trials (of 9216) remained for further analysis.

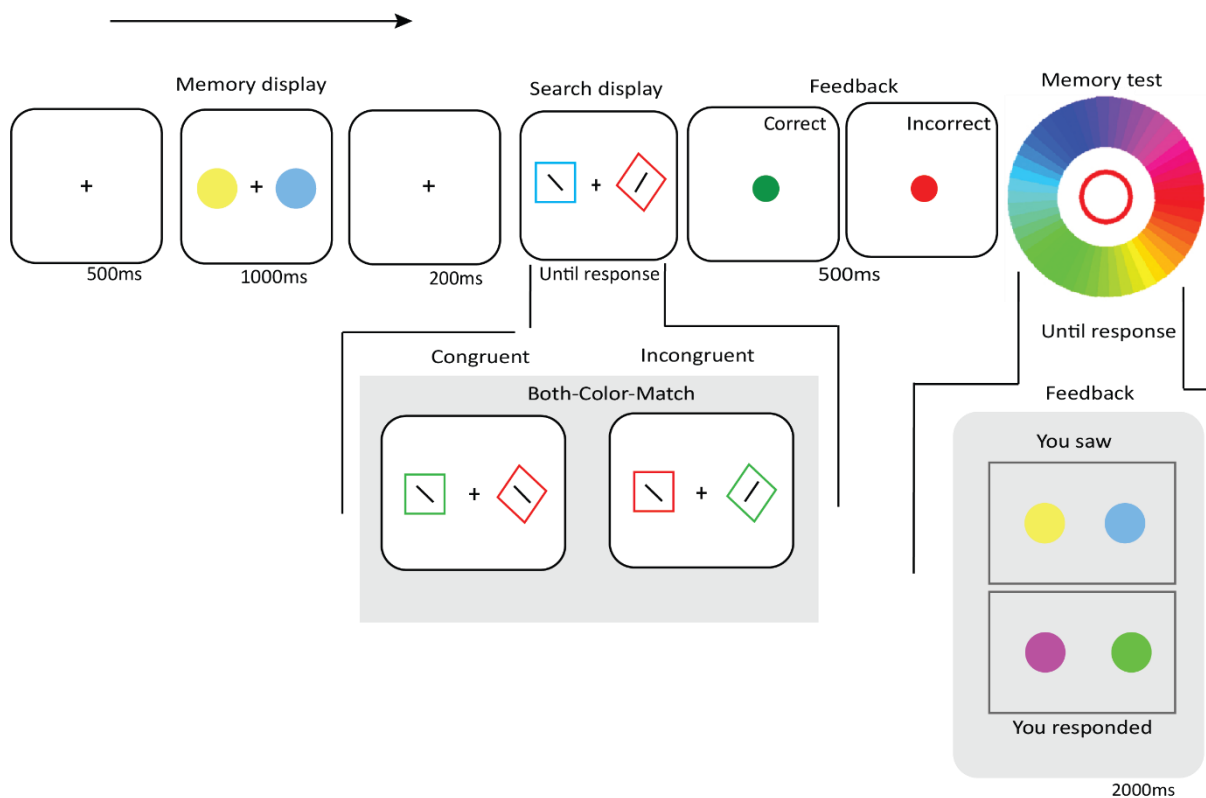

330

331 *Figure 4.* Sequence of events in a Distractor-Color-Match trial of *Experiment 2*.

332 **Results and Discussion**

333 **Search RTs**

334 Analyses revealed very strong evidence for effects of Target-Color-Match ( $BF_{10} =$   
335  $2.15 \times 10^6$ ) and Distractor-Color-Match ( $BF_{10} = 1.61 \times 10^6$ ), such that RTs were faster when the  
336 target matched the memory color, and slower when the distractor matched the memory color  
337 (*Figure 5*). Moreover, we found a very strong effect of Orientation-Congruency on RTs ( $BF_{10}$   
338  $= 72.25$ ), suggesting that participants were faster on congruent trials than on incongruent trials.

339 In addition, we observed moderate evidence for a Target-Color-Match  $\times$  Orientation-  
340 Congruency interaction ( $BF_{10} = 3.69$ ). To further qualify this effect, we performed a Bayesian  
341 ANOVA, with Orientation-Congruency and Distractor-Match as cofactors. When the target  
342 color did not match (*Figure 5b*), there was very strong evidence for a congruency effect ( $BF_{10}$   
343  $= 799.87$ ); in contrast, when target matched the memory color (*Figure 5a*), there was moderate  
344 evidence *against* a congruency effect ( $BF_{10} = 0.245$ ). No evidence for other interaction effects  
345 was found (all  $BF_{10} < .3$ ). (A supplementary analysis revealed an effect of Memory Precision  
346 on RTs. This indicates that when the participants' memory precision of the VWM items was  
347 higher, their search RTs were lower. There was no interaction of Memory Precision with any  
348 of the other factors. For more information, see the OSF project.)

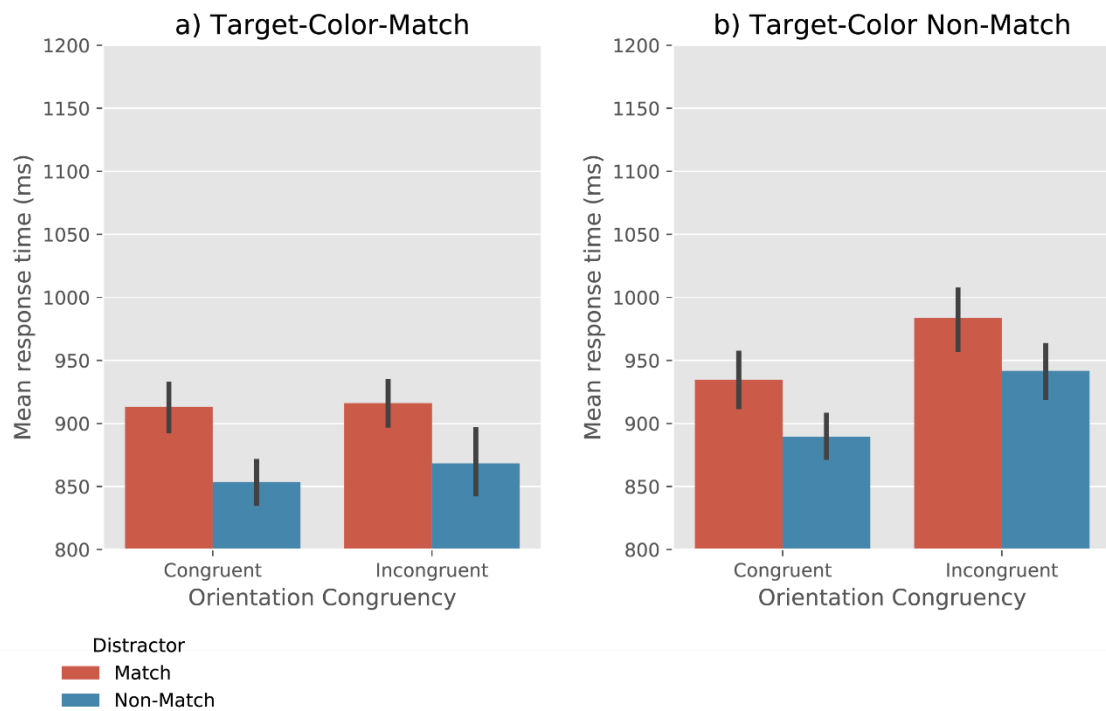

349

350 *Figure 5.* Mean response time as a function of Target-Color-Match, Distractor-Color-Match,  
351 and Orientation-Congruency. Error bars reflect condition-specific, within-subject 95%  
352 confidence intervals (Morey, 2008).

### 353 **RT distributions**

354 Similar to Experiment 1, the RT distribution of the Both-Target-Match trials was  
355 equally wide as that of the Non-Match trials ( $BF_{01} = 5.14$ , error % = .01), as predicted by the  
356 MIT hypothesis.

### 357 **Accuracy**

358 Analyses revealed very strong evidence for effects of Target-Color-Match ( $BF_{10} =$   
359 39.97) and Distractor-Color-Match ( $BF_{10} = 53.29$ ), such that the accuracy was higher when the  
360 target matched the memory color, and lower when the distractor matched the memory color  
361 (*Figure 6*). Moreover, we found very strong evidence for the effect of Orientation-Congruency

362 ( $BF_{10} = 1.19 \times 10^6$ ), suggesting that search was more accurate when the line-segment orientation  
363 in a target was congruent with that in a distractor.

364 In addition, we observed a Target-Color-Match  $\times$  Orientation-Congruency interaction  
365 ( $BF_{10} = 261.62$ ). This indicates that the congruency effect was stronger when the target did not  
366 match the memory color. Furthermore, there was moderate evidence for Distractor-Color-  
367 Match  $\times$  Orientation-Congruency interaction ( $BF_{10} = 8.15$ ), suggesting that the congruency  
368 effect was stronger when the distractor matched the memory color. No reliable evidence for a  
369 three-way interaction (Target-Color-Match  $\times$  Distractor-Color-Match  $\times$  Orientation-  
370 Congruency) was found ( $BF_{10} = 2.74$ ). (A supplementary analysis revealed an effect of  
371 Memory Precision on accuracy. This suggests that when the participants' memory precision  
372 was high, their visual search more accurate. There was no interaction of Memory Precision  
373 with any of the other factors. For more information, see the OSF project.)

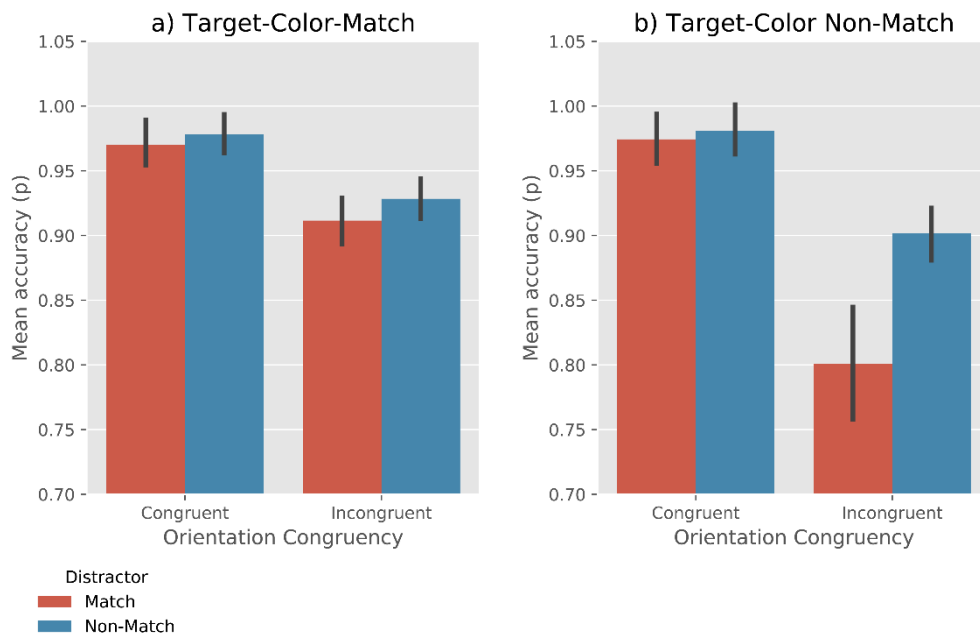

374  
375 *Figure 6.* Mean accuracy as a function of Target-Color-Match, Distractor-Color-Match, and  
376 Orientation-Congruency. Error bars reflect condition-specific, within-subject 95% confidence  
377 intervals (Morey, 2008).

378 In this experiment, we observed faster overall RTs and stronger congruency effects than  
379 in Experiment 1. This suggests that the irrelevant (grey) distractor in Experiment 1 did attract  
380 attention, thereby reducing overall performance. Nevertheless, we successfully replicated the  
381 attentional guidance by the target and the distractor when they match the VWM colors.  
382 Moreover, we found that when the target matched the VWM item, the congruency effect  
383 largely disappeared; however, when the target did not match the VWM item but the distractor  
384 did match, the congruency effect was particularly strong. Although we did not predict this  
385 pattern of results, this robust guidance by the memory-matching item is in line with the MIT  
386 hypothesis, as we will discuss in the General Discussion.

#### 387 **Drift-diffusion modeling**

388 As described above, the distribution of correct RTs is very similar for the Non-Color-  
389 Match and Both-Color-Match trials; this favors the Multiple-Item-Template (MIT) hypothesis  
390 over the Single-Item-Template (SIT) hypothesis. However, we wanted to compare the  
391 predictions that both hypotheses make about RT distributions more rigorously.

392 To do so, we used a two-sided drift-diffusion model to simulate responses, and to  
393 generate error rates and distributions of correct RTs. The model simulates an Activation Level  
394 that changes over time, using four parameters: A Threshold, a Drift Rate, a Noise Level, and a  
395 Timeout. At time 0, the Activation Level is 0. At time 1, the Activation Level is incremented  
396 by the Drift Rate, as well as by a value that is randomly sampled from a normal distribution  
397 with a standard deviation that is equal to the Noise Level. Because we constrain the Drift Rate  
398 in our model to be a positive value, the Activation Level tends to increase over time, although  
399 with an element of randomness. The point in time at which the Activation Level reaches the  
400 threshold is taken as the simulated RT for a correct response; if the Activation Level reaches a  
401 value of minus the threshold, this is taken as an incorrect response. If the Activation Level has

402 not reached a Threshold after a Timeout number of samples, the simulation is started again,  
403 until a valid RT is simulated. If no valid RT could be simulated after 1000 attempts, this was  
404 considered a failure to fit. A higher Drift Rate results, on average, in lower simulated RTs. A  
405 higher Noise Level results in more variable simulated RTs and increased error rates.

406         The Threshold was set to a constant value of 1. The Timeout was set to a constant value  
407 of 2000, corresponding to the 2000ms timeout in our experiments. The Drift Rate and Noise  
408 Level were determined for each participant separately, by taking all the RTs for a given  
409 participant, and rank-ordering them first based on whether they were correct or not, and then  
410 based on their value. Next, we simulated the same number of correct and incorrect RTs, using  
411 a candidate pair of values for the Drift Rate and Noise Level, and similarly rank-ordered these  
412 simulated RTs. We then took the residual sum of squares (RSS) of the real and simulated RTs.  
413 The Drift Rate and Noise Level were then chosen such that they minimized the RSS for a given  
414 participant. Phrased differently, we chose parameters such that they minimized the error  
415 between the real and simulated RT distributions for both correct and incorrect responses.

416         Next, we constructed two models that embodied the predictions of the MIT and SIT  
417 hypotheses. To do so, we added one additional parameter, Drift Rate Change, which was added  
418 to the basic Drift Rate to simulate the reduced RTs (facilitation) when attention was guided by  
419 the Target, and subtracted from the basic Drift Rate to simulate the increased RTs (interference)  
420 when attention was guided by the Colored Distractor. To keep the number of model parameters  
421 to a minimum, we used a single parameter for the Drift Rate Change for both facilitation and  
422 interference, rather than two separate parameters. This choice reflects our assumption that  
423 facilitation and interference should approximately cancel each other out, although there is no  
424 theoretical reason to assume that they do so perfectly.

425 The MIT and SIT hypotheses make slightly different predictions about the Drift Rate  
 426 in the different conditions (Table 1). In a nutshell, the MIT hypothesis predicts that a Target-  
 427 Color-Match should result in facilitation on every trial, and that a Distractor-Color-Match  
 428 should result in interference on every trial, and that the two should approximately cancel each  
 429 other out on both-match trials. In contrast, the SIT hypothesis predicts that a Target-Color-  
 430 Match should result in facilitation on only 50% of trials, because only one of the two VWM  
 431 items serves as an attentional template, and thus the probability of the Target matching the  
 432 attentional template is only 50%. For the same reason, a Distractor-Color-Match should result  
 433 in interference on only 50% of trials, and the Both-Color-Match condition should be a mixture  
 434 of 50% facilitation and 50% interference.

Table 1

*The Drift Rate in each condition as predicted by the MIT and SIT models. The percentages indicate the percentage of trials on which the Drift Rate has a particular value.*

| <b>Trial Type</b>      | <b>MIT model</b>                     | <b>SIT model</b>                                                           |
|------------------------|--------------------------------------|----------------------------------------------------------------------------|
| Non-Color-Match        | 100%: Drift Rate                     | 100%: Drift Rate                                                           |
| Target-Color-Match     | 100%: Drift Rate + Drift Rate Change | 50%: Drift Rate + Drift Rate Change<br>50%: Drift Rate                     |
| Distractor-Color-Match | 100%: Drift Rate - Drift Rate Change | 50%: Drift Rate - Drift Rate Change<br>50%: Drift Rate                     |
| Both-Color-Match       | 100%: Drift Rate                     | 50%: Drift Rate + Drift Rate Change<br>50%: Drift Rate - Drift Rate Change |

435



436 For each participant separately, and for the MIT and SIT models separately, we then  
437 determined the Drift Rate Change parameter, while keeping the other parameters as previously  
438 determined. This was done by taking all the RTs for a given participant, ordering them first by  
439 whether they were correct or not, then by trial type (Non-Color Match, Target-Color-Match,  
440 Distractor-Color-Match, Both-Color-Match), and then rank-ordering them from fast to slow.  
441 We then simulated the same number of RTs, using a candidate value for the Drift Rate Change,  
442 and similarly ordered these simulated RTs. The Drift Rate Change was then chosen such that it  
443 minimized the RSS between the real and simulated RTs. For the SIT model (but not the MIT  
444 model), even the optimal parameters failed to generate a sufficient number of incorrect  
445 responses for twelve participants; these participants were excluded from the analysis below,  
446 although these failures-to-fit already illustrate that the SIT model is less able to characterize  
447 human data than the MIT model is.

448 To test which model could best account for the data, we compared the RSS for the MIT  
449 model and the RSS for the SIT model with a default Bayesian, as well as a traditional, two-  
450 sided paired-samples t-test. This revealed very strong evidence ( $BF_{10} = 524$ ; error % =  
451  $2.67 \times 10^{-10}$ ;  $t(47) = 4.52$ ,  $p < .001$ ) in favor of the MIT hypothesis. To qualitatively compare  
452 the MIT and SIT model to the human data, we generated distributions of correct RTs, which  
453 were z-scored for each participant for visualization, as well as error rates. As shown in Figure  
454 7, the MIT model characterizes the human data better than the SIT model does, both in terms  
455 of correct RTs and error rates.

MULTIPLE ATTENTIONAL TEMPLATES GUIDE ATTENTION

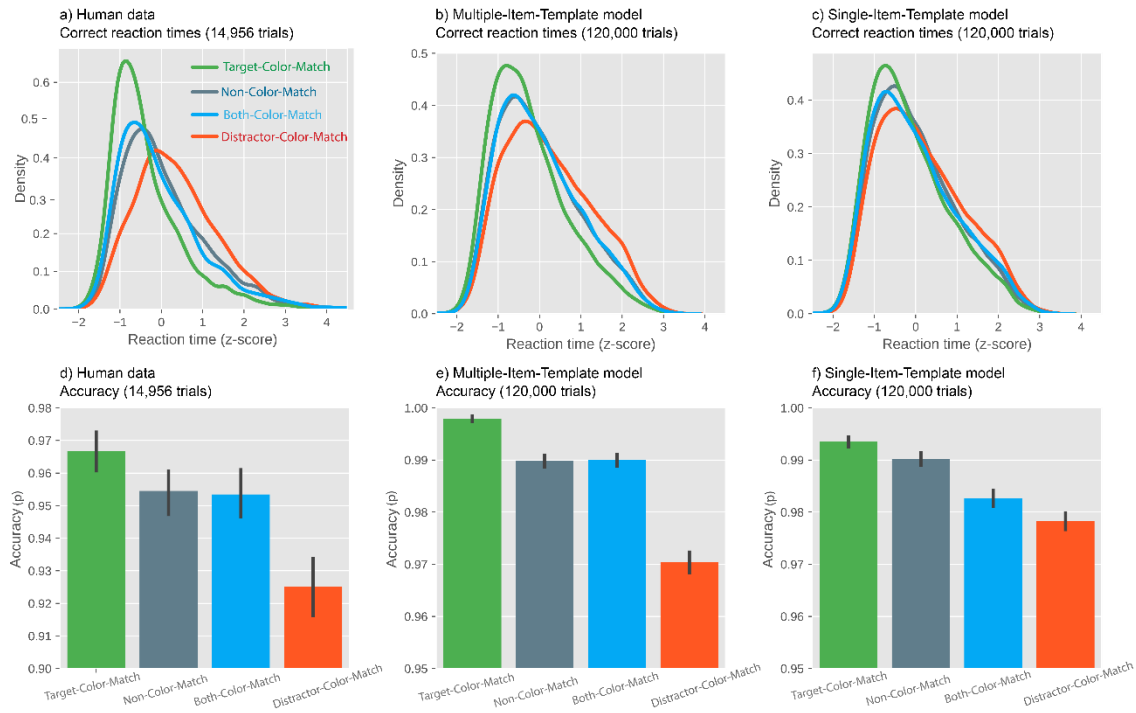

456

Figure 7. Top row: Distributions of correct response times for a) human data, b) the Multiple-Item-Template (MIT) model, and c) the Single-Item-Template (SIT) model. Bottom row: Accuracy (proportion of correct responses) for d) human data, e) the MIT model, and f) the SIT model.

457

### General Discussion

458           Here we report that multiple working-memory representations guide attention  
459 concurrently, thus providing crucial behavioral and computational evidence for a long-standing  
460 debate in the field of visual working memory (VWM). In our experiments, participants  
461 remembered two colors. Next, they performed a visual-search task in which the color of the  
462 target and that of a distractor could match, or not match, a color in VWM. We found that search  
463 was faster when there was a target-color match, showing that attention was guided towards  
464 memory-matching targets; similarly, we found that search was slower when there was a  
465 distractor-color match, showing that attention was (mis)guided towards memory-matching  
466 distractors.

467           To further test the predictions of the Multiple-Item-Template (MIT) and Single-Item-  
468 Template (SIT) hypotheses, the orientation of the line-segment inside the search target was  
469 manipulated to be either the same (i.e., congruent) or opposite (i.e., incongruent) to the line  
470 segment inside the distractor. Overall, this should result in an Orientation-Congruency effect,  
471 such that RTs are slower on incongruent compared to congruent trials if attention is divided  
472 between the target and the distractor. However, the MIT and SIT hypotheses make different  
473 predictions about when this congruency effect should be strongest. Specifically, the MIT  
474 hypothesis predicts that the congruency effect should be strongest on both-match trials (i.e.  
475 when both the target and the distractor matched the memorized colors). This prediction follows  
476 because only in that case attention would be drawn simultaneously towards the distractor and  
477 the target, thus creating the strongest interference (and thus the strongest congruency effect) in  
478 that condition. The SIT hypothesis makes no such prediction, because on both-match trials,  
479 attention would be guided either by the target or by the distractor dependent on which of the

480 colors was used as a template color, but not by both, and thus there is no reason to predict  
481 increased interference.

482         Although, we did *not* find an increased congruency effect on both-match trials, we *did*  
483 find that the congruency effect was largely absent whenever there was a target match in  
484 Experiment 2. This implies a two-stage model of visual search (Kastner & Nobre, 2014). First,  
485 attention is guided in parallel to (the color of) all memory-matching stimuli, resulting in  
486 facilitation by matching targets, and interference by matching distractors; that is, activation in  
487 the priority map is affected by the content of VWM. Next, the orientations of the line-segments  
488 inside the stimuli are processed serially; that is, highly activated items in the priority map are  
489 further processed one after another. On target-match trials, the line-segment inside the target is  
490 generally processed first, because participants have a search template for the target's shape (a  
491 diamond), which gives the target additional activation in the priority map; next, once the target  
492 has been processed, a decision is made, and the line-segment inside the distractor is left largely  
493 unprocessed. This would explain the strongly reduced interference by incongruent distractors  
494 on target-match trials. In general, this finding suggests that, on most trials, attention was  
495 captured by the memory-matching target (and not only on 50% of trials). Although we did not  
496 predict this, it is consistent with the MIT hypothesis that two templates can be simultaneously  
497 activated to guide attention. Compared to Experiment 1, in Experiment 2 we removed the  
498 unrelated distractor (i.e. the grey colored item) to reduce attentional capture by non-relevant  
499 distractor items, thereby inducing a stronger congruency effect, thus changing the task from a  
500 regular visual-search task to a discrimination task between a target and a single (colored)  
501 distractor. Crucially, the results remained qualitatively the same, suggesting that our results do  
502 not depend on the specifics of the task. Nevertheless, future studies could explore how  
503 including more search elements (e.g., more colored distractors that never match) affects the  
504 pattern of results.

505           In our paradigm, whenever there was a match between a memorized color and the color  
506 of an item in the search task, this match was always perfect. This raises the possibility that  
507 participants strategically attended to matching targets and distractors, to refresh their memory.  
508 However, previous studies have shown that memory-driven guidance of attention also occurs  
509 when there is only a categorical match (e.g. when participants memorize a shade of green, and  
510 the search distractor is a slightly different shade of green; Hollingworth & Beck, 2016;  
511 replicated in Frătescu et al., 2019). Therefore, our results are unlikely to depend on the use of  
512 perfect color matches. Nevertheless, the flexibility of memory-driven guidance is an important  
513 direction for future research: what exactly does it mean for visual input to ‘match’ the content  
514 of VWM?

515           Additionally, we analyzed the RT distribution for both-match and no-match trials (i.e.  
516 when neither the target nor the distractor matched the memorized colors). The MIT hypothesis  
517 predicts that the distribution for both-match and no-match trials should be the same (or at least  
518 similar). This follows from the MIT hypothesis, because on both-match trials, the facilitation  
519 due to attention being guided towards the target and the interference due to attention being  
520 guided towards the distractor should approximately cancel each other out. In contrast, the SIT  
521 hypothesis predicts a wider distribution for both-match trials than for no-match trials. This  
522 follows from the SIT hypothesis, because attention is guided either by the target or by the  
523 distractor in both-match trials (but never by both), thus resulting in a bimodal distribution that  
524 is wider than the distribution for no-match trials. Consistent with the MIT hypothesis, we found  
525 that the RT distribution for both-match trials resembled that for no-match trials. This implies  
526 that not only can multiple VWM items serve as attentional templates, but that it is also possible  
527 for focal attention to be allocated to multiple items at the same time rapidly (Eimer & Grubert,  
528 2014). To confirm this conclusion, we simulated the individual trials of RTs based on the

529 predictions of the MIT and the SIT hypothesis by means of a drift-diffusion model. Crucially,  
530 the observed data showed a better match to the simulated RTs based on the MIT hypothesis.

531         Taken together, our results provide evidence against the SIT hypothesis, which posits  
532 that there can only be one template active in working memory at one time to bias visual  
533 selection (Olivers et al., 2011; van Moorselaar et al., 2014). And we show behavioral and  
534 computational evidence for simultaneous guidance of multiple VWM items, providing support  
535 for the MIT hypothesis.

536 Open Practices Statement

537 All experimental data and materials can be found on the OSF (Open Science  
538 Framework): <https://osf.io/knmu2/>. The pre-registrations of the experiments are available at  
539 <https://osf.io/knmu2/registrations>.

540 Reference

- 541 Bays, P. M., & Husain, M. (2008). Dynamic Shifts of Limited Working Memory Resources  
542 in Human Vision. *Science*, 321(5890), 851. <https://doi.org/10.1126/science.1158023>
- 543 Beck, V. M., & Hollingworth, A. (2017). Competition in saccade target selection reveals  
544 attentional guidance by simultaneously active working memory representations.  
545 *Journal of Experimental Psychology: Human Perception and Performance*, 43(2),  
546 225–230. <https://doi.org/10.1037/xhp0000306>
- 547 Beck, V. M., Hollingworth, A., & Luck, S. J. (2012). Simultaneous Control of Attention by  
548 Multiple Working Memory Representations. *Psychological Science*, 23(8), 887–898.  
549 <https://doi.org/10.1177/0956797612439068>
- 550 Bundesen, C. (1990). A theory of visual attention. *Psychological Review*, 97(4), 523–547.  
551 <https://doi.org/10.1037/0033-295X.97.4.523>
- 552 Bundesen, C., Habekost, T., & Kyllingsbæk, S. (2005). A Neural Theory of Visual Attention:  
553 Bridging Cognition and Neurophysiology. *Psychological Review*, 112(2), 291–328.  
554 <https://doi.org/10.1037/0033-295X.112.2.291>
- 555 Chelazzi, L, Miller, E., Duncan, J., & Desimone, R. (1993). A neural basis for visual search  
556 in inferior temporal cortex. *Nature*, 363(6427), 345–347. PubMed.  
557 <https://doi.org/10.1038/363345a0>

- 558 Chelazzi, Leonardo, Duncan, J., Miller, E. K., & Desimone, R. (1998). Responses of Neurons  
559 in Inferior Temporal Cortex During Memory-Guided Visual Search. *Journal of*  
560 *Neurophysiology*, 80(6), 2918–2940. <https://doi.org/10.1152/jn.1998.80.6.2918>
- 561 Chetverikov, A., Campana, G., & Kristjánsson, Á. (2016). Building ensemble  
562 representations: How the shape of preceding distractor distributions affects visual  
563 search. *Cognition*, 153, 196–210. WorldCat.org.  
564 <https://doi.org/10.1016/j.cognition.2016.04.018>
- 565 Chetverikov A, Campana G, & Kristjánsson Á. (2017). Representing Color Ensembles.  
566 *Psychological Science*, 28(10), 1510–1517. WorldCat.org.  
567 <https://doi.org/10.1177/0956797617713787>
- 568 Desimone, R. (1998). Visual Attention Mediated by Biased Competition in Extrastriate  
569 Visual Cortex. *Philosophical Transactions: Biological Sciences*, 353(1373), 1245–  
570 1255. WorldCat.org.
- 571 Dombrowe, I., Donk, M., & Olivers, C. N. L. (2011). The costs of switching attentional sets.  
572 *Attention, Perception, & Psychophysics*, 73(8), 2481–2488.  
573 <https://doi.org/10.3758/s13414-011-0198-3>
- 574 Eimer, M., & Grubert, A. (2014). Spatial Attention Can Be Allocated Rapidly and in Parallel  
575 to New Visual Objects. *Current Biology*, 24(2), 193–198.  
576 <https://doi.org/10.1016/j.cub.2013.12.001>
- 577 Faul, F., Erdfelder, E., Lang, A.-G., & Buchner, A. (2007). G\*Power 3: A flexible statistical  
578 power analysis program for the social, behavioral, and biomedical sciences. *Behavior*  
579 *Research Methods*, 39(2), 175–191. <https://doi.org/10.3758/BF03193146>
- 580 Frătescu, M., Van Moorselaar, D., & Mathôt, S. (2019). Can you have multiple attentional  
581 templates? Large-scale replications of Van Moorselaar, Theeuwes, and Olivers (2014)



- 582 and Hollingworth and Beck (2016). *Attention, Perception, & Psychophysics*, 81(8),  
583 2700–2709. <https://doi.org/10.3758/s13414-019-01791-8>
- 584 Hollingworth, A., & Beck, V. M. (2016). Memory-based attention capture when multiple  
585 items are maintained in visual working memory. *Journal of Experimental*  
586 *Psychology: Human Perception and Performance*, 42(7), 911–917.  
587 <https://doi.org/10.1037/xhp0000230>
- 588 Houtkamp, R., & Roelfsema, P. R. (2006). The effect of items in working memory on the  
589 deployment of attention and the eyes during visual search. *Journal of Experimental*  
590 *Psychology: Human Perception and Performance*, 32(2), 423–442.  
591 <https://doi.org/10.1037/0096-1523.32.2.423>
- 592 Kastner, S., & Nobre, K. (2014). *The Oxford handbook of attention* (Vol. 1–1 online resource  
593 : illustrations.). Oxford University Press; WorldCat.org.  
594 <http://dx.doi.org/10.1093/oxfordhb/9780199675111.001.0001>
- 595 Kristjánsson, T., & Kristjánsson, Á. (2018). Foraging through multiple target categories  
596 reveals the flexibility of visual working memory. *Acta Psychologica*, 183, 108–115.  
597 <https://doi.org/10.1016/j.actpsy.2017.12.005>
- 598 Kristjánsson, T., Thornton, I. M., & Kristjánsson, Á. (2018). Time limits during visual  
599 foraging reveal flexible working memory templates. *Journal of Experimental*  
600 *Psychology: Human Perception and Performance*, 44(6), 827–835.  
601 <https://doi.org/10.1037/xhp0000517>
- 602 Lee, M. D., & Wagenmakers, E.-J. (2013). *Bayesian cognitive modeling : a practical course*  
603 (Vol. 1–1 online resource (xiii, 264 pages) : illustrations). Cambridge University  
604 Press; WorldCat.org. <https://doi.org/10.1017/CBO9781139087759>

- 605 Mathôt, S., Schreij, D., & Theeuwes, J. (2012). OpenSesame: An open-source, graphical  
606 experiment builder for the social sciences. *Behavior Research Methods*, *44*(2), 314–  
607 324. <https://doi.org/10.3758/s13428-011-0168-7>
- 608 Morey, R. D. (2008). Confidence Intervals from Normalized Data: A correction to Cousineau  
609 (2005). *Tutorials in Quantitative Methods for Psychology*, *4*(2), 61–64. WorldCat.org.  
610 <https://doi.org/10.20982/tqmp.04.2.p061>
- 611 Olivers, C. N. L., Peters, J., Houtkamp, R., & Roelfsema, P. R. (2011). Different states in  
612 visual working memory: when it guides attention and when it does not. *Trends in*  
613 *Cognitive Sciences*, *15*(7), 327–334. WorldCat.org.  
614 <https://doi.org/10.1016/j.tics.2011.05.004>
- 615 Ratcliff, R., & McKoon, G. (2008). The diffusion decision model: theory and data for two-  
616 choice decision tasks. *Neural Computation*, *20*(4), 873–922. PubMed.  
617 <https://doi.org/10.1162/neco.2008.12-06-420>
- 618 Rouder, J. N., Speckman, P. L., Sun, D., Morey, R. D., & Iverson, G. (2009). Bayesian t tests  
619 for accepting and rejecting the null hypothesis. *Psychonomic Bulletin & Review*,  
620 *16*(2), 225–237. WorldCat.org. <https://doi.org/10.3758/PBR.16.2.225>
- 621 Sung, K. (2008). Serial and parallel attentive visual searches: Evidence from cumulative  
622 distribution functions of response times. *Journal of Experimental Psychology: Human*  
623 *Perception and Performance*, *34*(6), 1372–1388. <https://doi.org/10.1037/a0011852>
- 624 Theeuwes J. (1992). Perceptual selectivity for color and form. *Perception & Psychophysics*,  
625 *51*(6), 599–606. WorldCat.org.
- 626 van Moorselaar, D., Theeuwes, J., & Olivers, C. N. L. (2014). In competition for the  
627 attentional template: Can multiple items within visual working memory guide  
628 attention? *Journal of Experimental Psychology: Human Perception and Performance*,  
629 *40*(4), 1450–1464. <https://doi.org/10.1037/a0036229>
